# Supplementary material for: Glucose and NAADP trigger elementary intracellular β-cell Ca2+ signals
Source: PubMed Central journal article supplement (PMC8140081; doi:10.1038/s41598-021-88906-0), 2021-05-21
Supplement: 41598_2021_88906_MOESM3_ESM.pdf [file 41598_2021_88906_MOESM3_ESM.pdf]

## **Glucose and NAADP trigger elementary intracellular $\beta$ -cell $\text{Ca}^{2+}$ signals**

Paula Maria Heister<sup>1,2</sup>, Trevor Powell<sup>1</sup> & Antony Galione<sup>1</sup>

<sup>1</sup> Department of Pharmacology, Mansfield Road, Oxford OX1 3QT, UK

<sup>2</sup> Department of Pathology, Addenbrooke's Hospital, Hills Road, Cambridge CB2 0QQ, UK

**Supplementary Files**

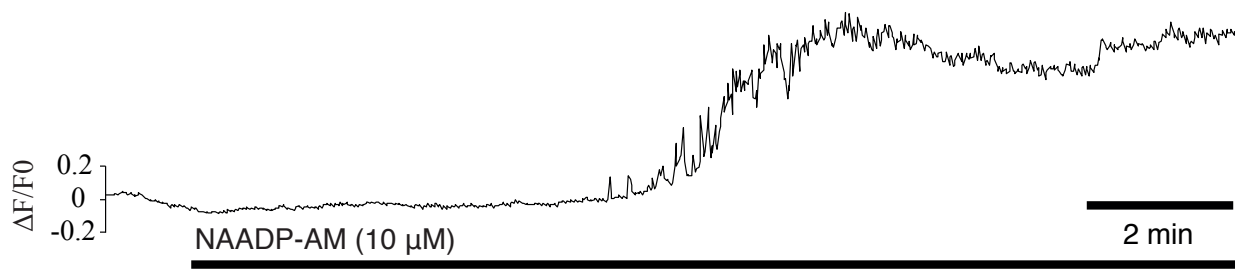

**Figure S1 (Extended Data)  $\beta$ -cell sub-membrane  $\text{Ca}^{2+}$  response to NAADP-AM as recorded with TIRF.** Representative trace of a submembrane calcium response to stimulation with 10 $\mu$ M NAADP-AM in the presence of 3mM glucose (used as baseline glucose in all experiments, see methods).

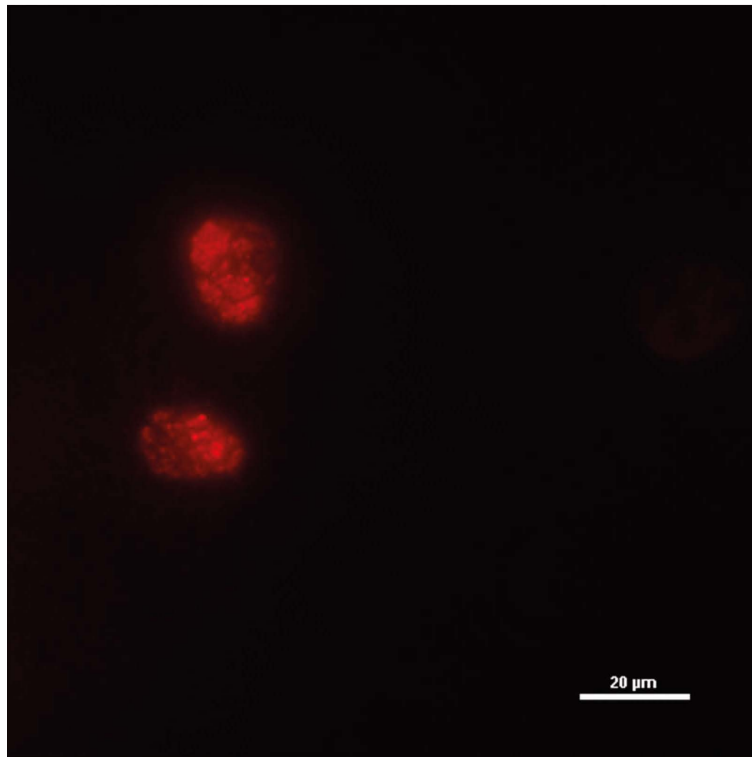

**Figure S2 (Extended Data) Visualisation of acidic stores in the TIRF plane.** LysoTracker Red labelling of  $\beta$ -cells as viewed with TIRF under 60 x magnification.

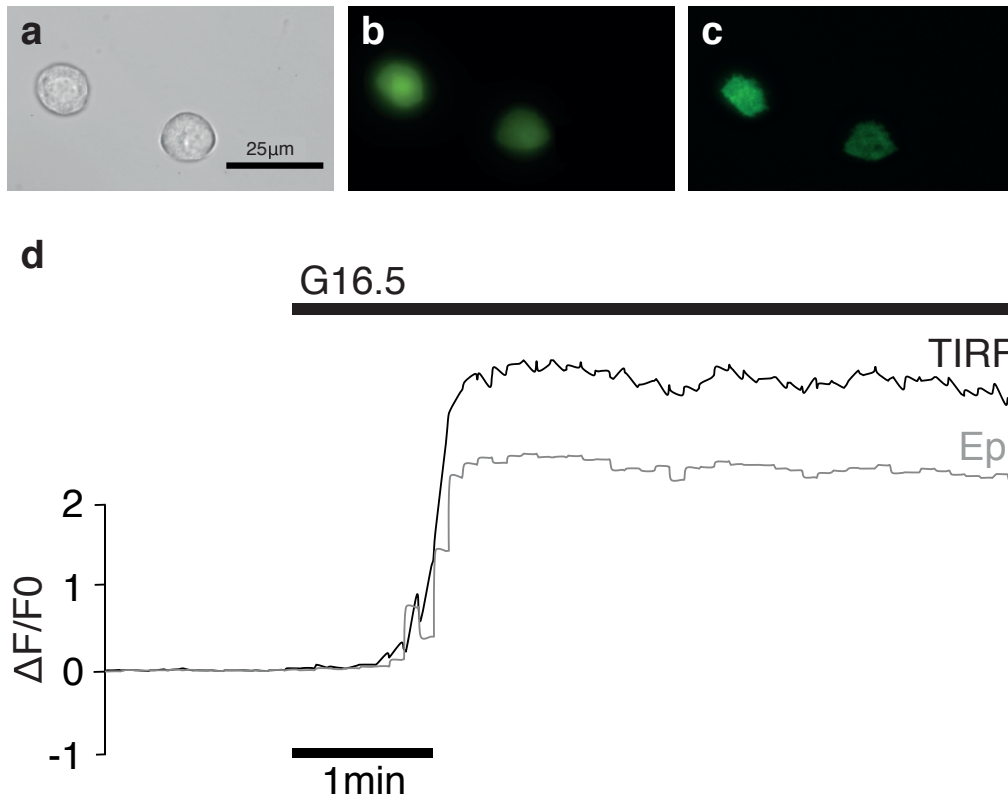

**Figure S3 (Extended Data) Parallel imaging of TIRF and epifluorescence in  $\beta$ -cells.** Examples of representative (a) brightfield, (b) epifluorescence, and (c) TIRF images of individual  $\beta$ -cells loaded with fluo-4 at 60 x magnification. (d) Representative trace of a parallel recording of whole-cell (epifluorescence; grey trace) and submembrane (TIRF; black trace)  $\text{Ca}^{2+}$  in response to 16.5 mM glucose in a  $\beta$ -cell.

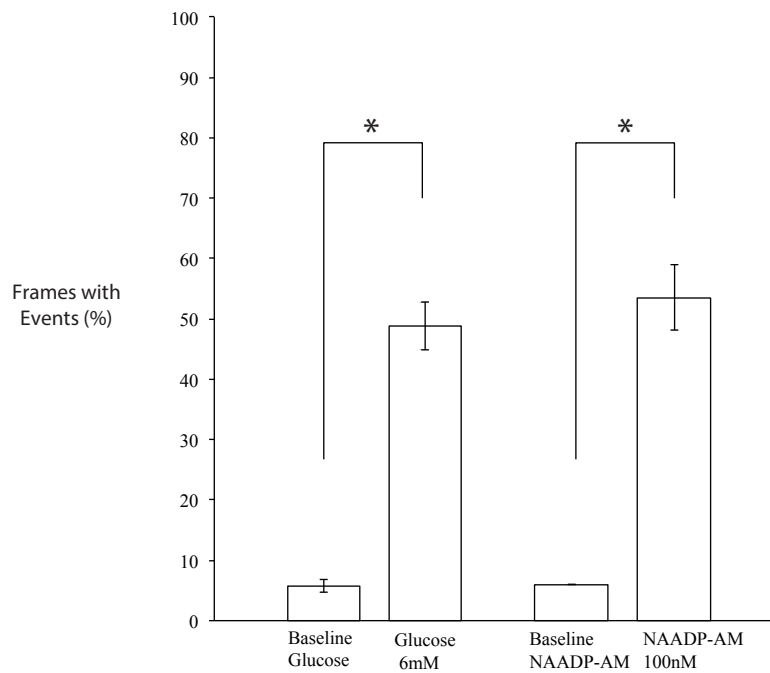

**Figure S4 (Extended Data) Quantification of calcium release events in the presence of high EGTA (5mM).** Percentage of frames showing events (defined as events of an amplitude more than 2 standard deviations above the baseline mean) before (baseline) and after stimulation with glucose (6mM) or NAADP-AM (100 nM) in the presence of 5mM EGTA. Results are from 4 cells (4 experiments, 2 animals) and 2 cells (2 experiments, 2 animals) respectively. \* denotes significance (paired samples, one-tailed Student's t-test,  $p < 0.01$ ,  $p < 0.05$ , respectively).

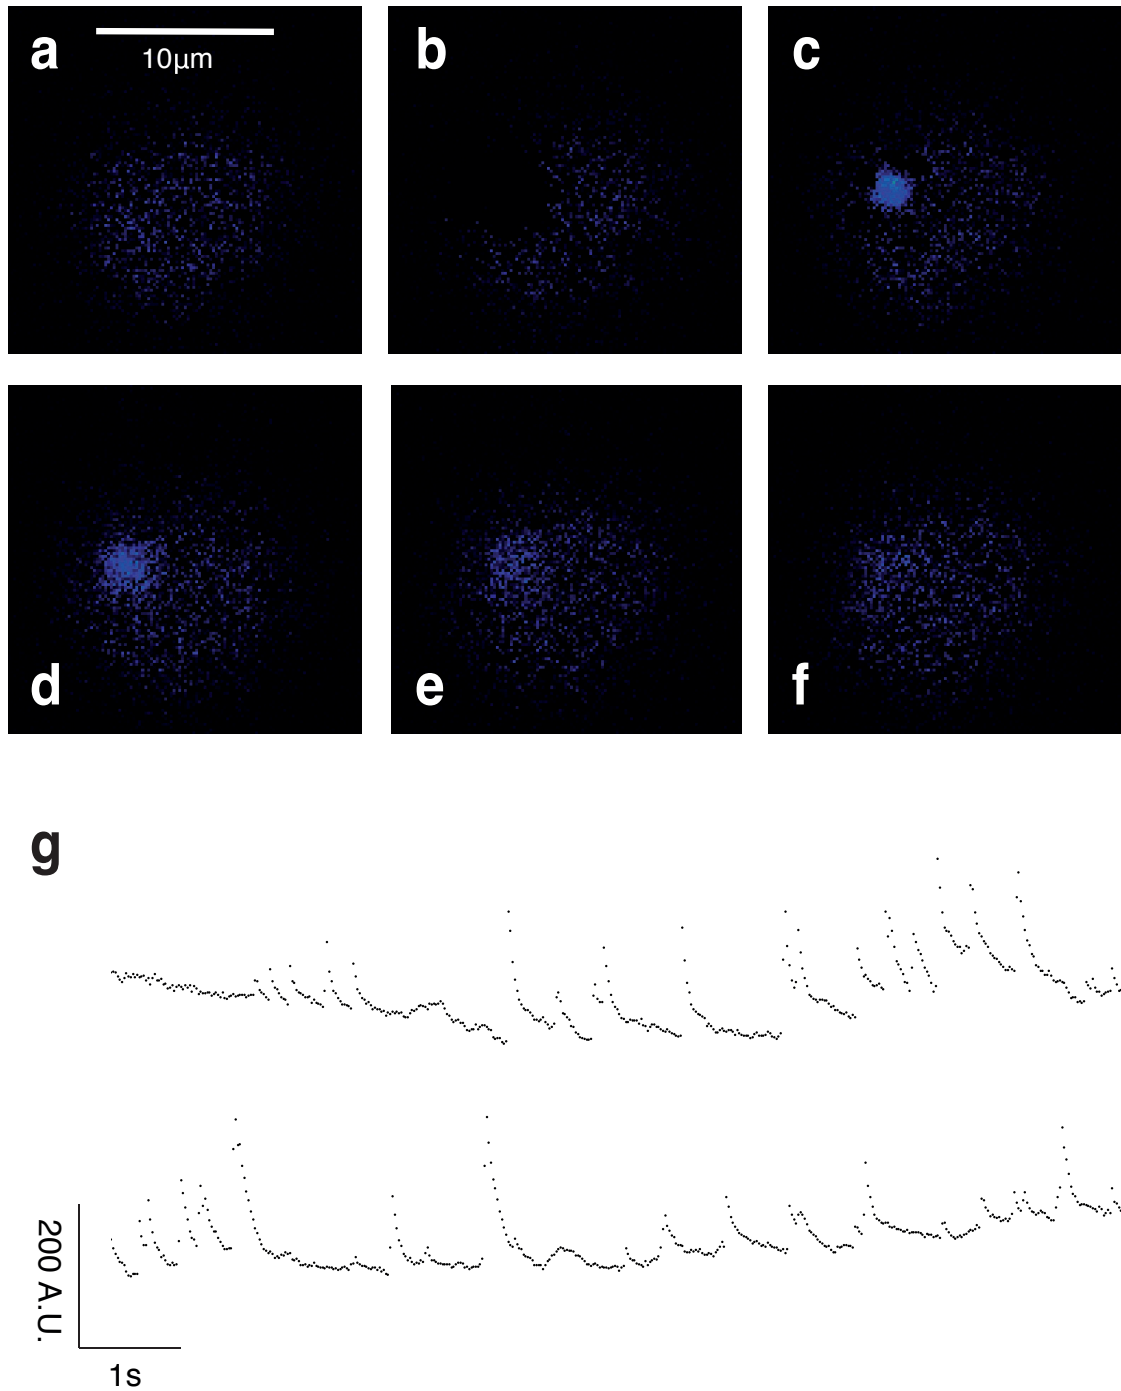

**Figure S5 (Extended Data) High speed recordings of calcium events for illustration of diameter and time course.** Cells were investigated as above but recorded at  $\sim 46$  frames/second (hardware limit for the setup; proof of method experiment,  $n = 2$ , 1 experiment, 1 animal). (a – f) Images of a  $\beta$ -cell over the time course of one individual localised calcium event. (g) fluorescence intensity over time for two individual  $\beta$ -cells (note: traces not normalised, y-axis in arbitrary units, A. U.)

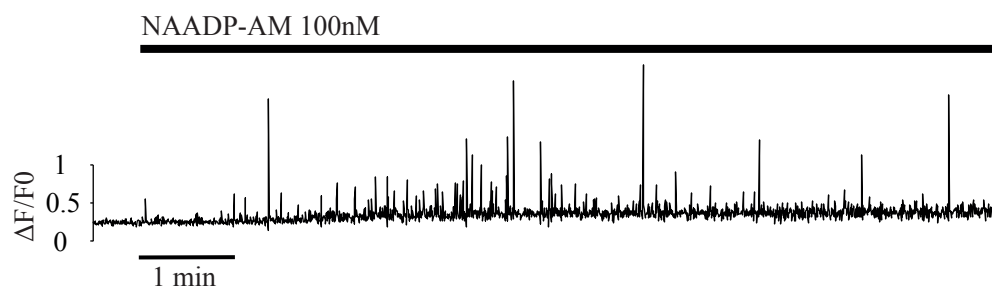

**Figure S6 (Extended Data) Calcium release events increase and then decrease after stimulation.** Representative TIRF trace of a  $\beta$ -cell stimulated with 100 nM NAADP-AM in the presence of low EGTA after preincubation with thapsigargin. Maximum intensity change of subsequent frames after normalising to baseline plotted against time.

## Supplementary Movie Legends

**Movie 1 (Extended Data)** First recording of elementary events in a pancreatic  $\beta$ -cell cluster in response to NAADP-AM (100 nM) visualised using TIRF microscopy at 100 x magnification. At the end of the experiment, extracellular  $\text{Ca}^{2+}$  is re-admitted, demonstrating a global  $\text{Ca}^{2+}$  response and cell viability. Recording speed: 3.3Hz, playback speed increased for ease of viewing.

**Movie 2 (Extended Data)** Recording of elementary calcium events in two pancreatic  $\beta$ -cells recorded at RAM capture speed ( $\sim 46\text{Hz}$ ) following spark detection (proof of method experiment, n = 2, 1 experiment, 1 animal).
